# Supplementary material for: A New Method for Assessing Masking and Residual Inhibition of Tinnitus
Source: PubMed Central journal article supplement — Trends Hear. 2018 Apr 30;22:2331216518769996. doi: 10.1177/2331216518769996 (PMC5949940; doi:10.1177/2331216518769996), 2018-04-30
Supplement: Supplementary_Tables.pdf [file Supplementary_Tables.pdf]

Table 1. Comparison of the MML and MRIL characteristics between the different residual inhibition sub-groups for Marseille site only.

|                                                                  | RI sub-groups    |                |                   |                                          |                                    |
|------------------------------------------------------------------|------------------|----------------|-------------------|------------------------------------------|------------------------------------|
|                                                                  | Complete<br>N=16 | Partial<br>N=8 | Persistent<br>N=4 | Increased<br>tinnitus<br>loudness<br>N=4 | Change in tinnitus<br>pitch<br>N=2 |
| <i>MML in dB SL (SD)</i>                                         |                  |                |                   |                                          |                                    |
| - Broadband                                                      | 21 (11)          | 21 (12)        | 26 (8)            | 23 (6)                                   | 23 (5)                             |
| - Tinnitus frequency                                             | 5 (20)           | 13 (13)        | 9 (4)             | 33.2 (32)                                | 30 (14)                            |
| - HL slope frequency                                             | 7 (8)            | 6 (11)         | 11 (12)           | 37 (29)                                  | 32 (3)                             |
| - Outside HL frequency                                           | 38 (27)          | 53 (24)        | 19 (8)            | 49 (32)                                  | 54 (44)                            |
| <i>MRIL in dB SL (SD)</i>                                        |                  |                |                   |                                          |                                    |
| - Broadband                                                      | 33 (12)          | 31 (10)        | 33 (14)           | N.A.                                     | N.A.                               |
| - Tinnitus frequency                                             | 10 (19)          | 19 (13)        | 16 (6)            | N.A.                                     | N.A.                               |
| - HL slope frequency                                             | 19 (17)          | 12 (11)        | 17 (18)           | N.A.                                     | N.A.                               |
| - Outside HL frequency                                           | 47 (24)          | 63 (17)        | 34 (17)           | N.A.                                     | N.A.                               |
| <i>MRIL – MML:<br/>Difference in dB SL (SD)</i>                  |                  |                |                   |                                          |                                    |
| - Broadband                                                      | 12 (8)           | 8 (6)          | 5 (5)             | N.A.                                     | N.A.                               |
| - Tinnitus frequency                                             | 7 (4)            | 5 (4)          | 7 (3)             | N.A.                                     | N.A.                               |
| - HL slope frequency                                             | 12 (14)          | 6 (3)          | 6 (6)             | N.A.                                     | N.A.                               |
| - Outside HL frequency                                           | 7 (12)           | 2 (3)          | 15 (9)            | N.A.                                     | N.A.                               |
| <i>Pure tone average in dB HL (SD)</i>                           |                  |                |                   |                                          |                                    |
| - Low frequency                                                  | 23 (10)          | 28 (18)        | 24 (9)            | 13 (8)                                   | 9 (1)                              |
| - Mid frequency                                                  | 26 (14)          | 36 (24)        | 27 (5)            | 14 (7)                                   | 10 (4)                             |
| - High frequency                                                 | 43 (26)          | 52 (24)        | 48 (21)           | 21 (12)                                  | 22 (16)                            |
| <i>Visual analog scale of tinnitus<br/>loudness (mean score)</i> |                  |                |                   |                                          |                                    |
| - Before the experiment                                          | 5                | 7              | 5                 | 5                                        | 3.75                               |
| - After the experiment                                           | 3                | 4              | 1                 | 5                                        | 2.5                                |

Pure tone average (PTA), PTA low-freq includes 250, 500 and 750 Hz, PTA mid-freq includes 1000, 1500, 2000 and 3000 Hz, PTA high freq includes 4000, 6000 and 8000 Hz

Table 2. Mean differences between broadband noise and NBN (Marseille site)

| Comparisons                      | Mean difference in dB SL (SD) | Paired <i>T</i> -test | <i>P</i> -value |
|----------------------------------|-------------------------------|-----------------------|-----------------|
| <b>MML</b>                       |                               |                       |                 |
| Broadband – Tinnitus frequency   | 13.5 (24.9)                   | $t(25) = 2.77$        | .01             |
| Broadband – HL slope frequency   | 12.2 (13.1)                   | $t(19) = 4.14$        | .001            |
| Broadband – Outside HL frequency | -21.4 (26.4)                  | $t(22) = -3.89$       | .001            |
| <b>MRIL</b>                      |                               |                       |                 |
| Broadband – Tinnitus frequency   | 19.1 (24.6)                   | $t(18) = 3.37$        | .003            |
| Broadband – HL slope frequency   | 15.3 (15.2)                   | $t(15) = 4.01$        | .001            |
| Broadband – Outside HL frequency | -20 (20.9)                    | $t(16) = -3.95$       | .001            |

Table 3. Mean differences and correlations between the MRIL and MML (n = number of patients).

| Stimulation frequency       | Mean difference in dB MRIL – MML (SD) | Paired <i>T</i> -test | <i>P</i> -value | Pearson's correlation coefficient (r) | <i>P</i> -value |
|-----------------------------|---------------------------------------|-----------------------|-----------------|---------------------------------------|-----------------|
| <b>Lyon site</b>            |                                       |                       |                 |                                       |                 |
| 500 Hz (n=29)               | 12.5 (12.7)                           | $t(28) = 5.3$         | <.001           | .93                                   | <.001           |
| 1000 Hz (n=34)              | 10.5 (8.1)                            | $t(33) = 7.6$         | <.001           | .95                                   | <.001           |
| 2000 Hz (n=34)              | 12 (10)                               | $t(33) = 6.9$         | <.001           | .92                                   | <.001           |
| 3000 Hz (n=25)              | 13 (11.6)                             | $t(24) = 5.6$         | <.001           | .84                                   | <.001           |
| 4000 Hz (n=34)              | 10.7 (10.1)                           | $t(33) = 6.2$         | <.001           | .90                                   | <.001           |
| 6000 Hz (n=30)              | 7.9 (9.1)                             | $t(29) = 4.7$         | <.001           | .81                                   | <.001           |
| 8000 Hz (n=31)              | 6 (8.2)                               | $t(30) = 4.1$         | <.001           | .90                                   | <.001           |
| <b>Merged sites</b>         |                                       |                       |                 |                                       |                 |
| Tinnitus frequency (n=48)   | 8.5 (8)                               | $t(47) = 7.4$         | <.001           | .93                                   | <.001           |
| HL slope frequency (n=46)   | 10.3 (10.2)                           | $t(45) = 6.8$         | <.001           | .87                                   | <.001           |
| Outside HL frequency (n=47) | 8.6 (8.9)                             | $t(46) = 6.6$         | <.001           | .95                                   | <.001           |
